# Supplementary material
Source: PubMed Central journal article supplement (PMC2604967)
Supplement: 0810388105_0810388105SI.pdf [file 0810388105_0810388105SI.pdf]

# Supporting Information

Shao *et al.* 10.1073/pnas.0810388105

## SI Materials and Methods

### Animal Care

Male A/J, C57BL/6J, and C57BL/6J-Chr<sup>A/J</sup>/NaJ mice were obtained from our breeding colonies. Mice were housed in ventilated racks and maintained at constant temperature ( $\approx 21^\circ\text{C}$ ) and on a 12 h light/12 h dark cycle. Litters were weaned at 3 weeks of age. Mice had access to food and water ad libitum unless otherwise indicated. Laboratory Autoclavable Rodent Diet 5010 (LabDiet) was used for the breeding colonies.

**Dissection.** Following bleeding, mice were cervically dislocated. The mice were opened and all blood vessels leading to the liver were cut, starting anteriorly and working posteriorly, and allowed to bleed out. The liver was removed intact, weighed, and dissected for liver triglyceride determination. The same lobes of the liver were used for each experimental purpose whenever possible.

### Biochemical Assays

**Serology.** At 21 weeks of age mice were fasted overnight ( $\approx 16$ – $18$  h), weighed, and anesthetized with an i.p. injection of 0.8-mg/g Avertin. Once anesthetized, nose-to-anus length and tail blood glucose measures (OneTouch Ultra, LifeSpan) were taken. With a heparinized microhematocrit capillary tube (Fisherbrand),  $\approx 500\ \mu\text{L}$  of blood was drawn from the retro-orbital sinus into a StatSpin blood separation tube and centrifuged for 4 min at  $\approx 2000 \times g$  in a bench-top minicentrifuge (Qualitron). Plasma was analyzed for cholesterol, glucose, and triglycerides by using commercially available reagents and standards (Pointe Scientific) in combination with a split-beam spectrophotometer (Genesys 5, Spectronic) following manufacturers procedures. Insulin was measured by using a mouse ultrasensitive insulin ELISA (Mercodia) in combination with a Wallac Victor<sup>3</sup> 1420 Multilabel Counter (Perkin–Elmer).

**Liver triglycerides.** Liver samples were immediately frozen on dry ice and kept at  $-80^\circ\text{C}$ . To quantify the triglyceride content of the liver, between 100 to 200 mg of liver was saponified in an equal volume ( $\mu\text{L}$ ) by weight (mg) of 3M KOH, 65% ethanol (1). After activation of the reaction at  $70^\circ\text{C}$  for 1 h and incubation at room temperature for 24 h, the volume of each saponified liver was adjusted to 500  $\mu\text{L}$  per 100-mg tissue used with 50 mM Tris (pH 7.5). Also, each sample was diluted 10-fold with 50 mM Tris (pH 7.5) before triglyceride determination. The liberated glycerol was measured against glycerol standards by using a commercially available triglyceride reagent (Pointe Scientific) in combination with a split-beam spectrophotometer (Genesys 5, Spectronic).

**Homocysteine.** Methods were described in ref. 2.

### Bone Biology

**Mice.** Most CSSs were raised at Case Western Reserve University, except for several that were purchased from the Jackson Laboratory and raised at Mount Sinai School of Medicine. Mice were fed standard mouse chow (Purina Lab Chow 5001) and water ad libitum, and kept on a 12 h light:dark cycle.

**Whole bone mechanical properties.** Femurs from 112 day old A/J, C57BL/6J, and C57BL/6J-Chr<sup>A/J</sup>/NaJ strains males and females at 4 months of age were loaded-to-failure in 4-point bending at 0.05 mm/s by using a servohydraulic materials test system (Instron) to assess whole bone mechanical properties (3). Load-deflection curves were analyzed for stiffness, maximum load,

postyield deflection, and work-to-failure. These 4 monotonic properties fully describe the failure of mouse femurs (4). Stiffness was calculated as the slope of the initial portion of the load-deflection curve. Postyield deflection, a measure of bone ductility, was calculated as the deflection at failure minus the deflection at yield. Yield was defined as a 10% reduction of secant stiffness (load range normalized for deflection range) relative to the initial (tangent) stiffness. Work-to-failure was calculated as the area under the load-deflection curve. Femurs were tested at room temperature and kept moist with PBS during all tests. Means and standard deviations of each property were calculated for each strain.

**Bone morphology.** The morphological properties describing the size and shape of the femoral diaphysis were assessed with histological sections as described previously (3). Briefly, plastic-embedded femurs were sectioned transversely beginning immediately distal to the third trochanter. Morphological traits describing the amount of tissue (cortical area, cortical thickness) and the spatial distribution of tissue (periosteal diameter, polar moment of inertia) were quantified for 3 mid-diaphyseal cross-sections for each femur and the values averaged. Measuring both the amount and distribution of tissue is necessary because structures having the same cross-sectional area but different moments of inertia (e.g., a solid cylinder and a tube) will exhibit different mechanical behaviors in bending and torsion (5).

**Composition.** Ash content was quantified for the femurs subjected to mechanical testing (3). For each sample, the diaphysis was isolated, cleaned of soft tissue, and the hydrated weight, dried, and ashed weights were measured as described (3). Ash content was defined as the ash weight normalized for hydrated weight.

**Congenic Panel Construction.** Panels of congenic strains derived from C57BL/6J-Chr6<sup>A/J</sup>/NaJ and C57BL/6J-Chr10<sup>A/J</sup>/NaJ were constructed. For the CSS-6 congenic strains, F2 progeny of intercrosses between (C57BL/6J-Chr6<sup>A/J</sup>/NaJ  $\times$  C57BL/6J)F1 hybrids were genotyped with microsatellite markers to identify individuals that inherited recombinant A/J-derived chromosome 6. These F2 mice were backcrossed to C57BL/6J and offspring that were heterozygous for the selected region (identified by genotyping) were intercrossed to homozygose the A/J-derived segment. The congenic strains were then maintained with brother-sister matings. For CSS-10 congenic strains, (C57BL/6J-Chr10<sup>A/J</sup>/NaJ  $\times$  C57BL/6J)F1 hybrids were backcrossed to C57BL/6J and progeny were typed for microsatellite markers to identify individuals that inherited recombinant A/J-derived chromosome 10. These mice were then backcrossed to C57BL/6J and offspring that were heterozygous for the recombinant chromosome were intercrossed to homozygose the A/J-derived segment. The congenic strains were then maintained with brother-sister matings.

### Genotyping

**DNA and PCR.** For microsatellite markers (SSLPs), tail tissue was digested with proteinase K (Invitrogen) in  $1\times$  PCR buffer (Invitrogen) overnight at  $55^\circ\text{C}$ . The enzyme was inactivated at  $100^\circ\text{C}$  for 1 h before by using the DNA for genotyping. For single nucleotide polymorphisms (SNPs), DNA was isolated with standard methods (Qiagen DNeasy Kit). PCR reactions for SSLPs were performed in  $1\times$  PCR buffer, 2 mM MgCl<sub>2</sub>, 0.3 mM of each dNTP, 0.03 units of Taq polymerase/ $\mu\text{L}$  and 0.4–0.5  $\mu\text{M}$  of forward and reverse primers in 25  $\mu\text{L}$  total reaction volume. The reaction conditions were:  $94^\circ\text{C}$  for 2 min,  $94^\circ\text{C}$  for 1 min,  $60^\circ\text{C}$  for 1 min,  $72^\circ\text{C}$  for 1 min, repeat steps 2–4 34 times,  $72^\circ\text{C}$  for





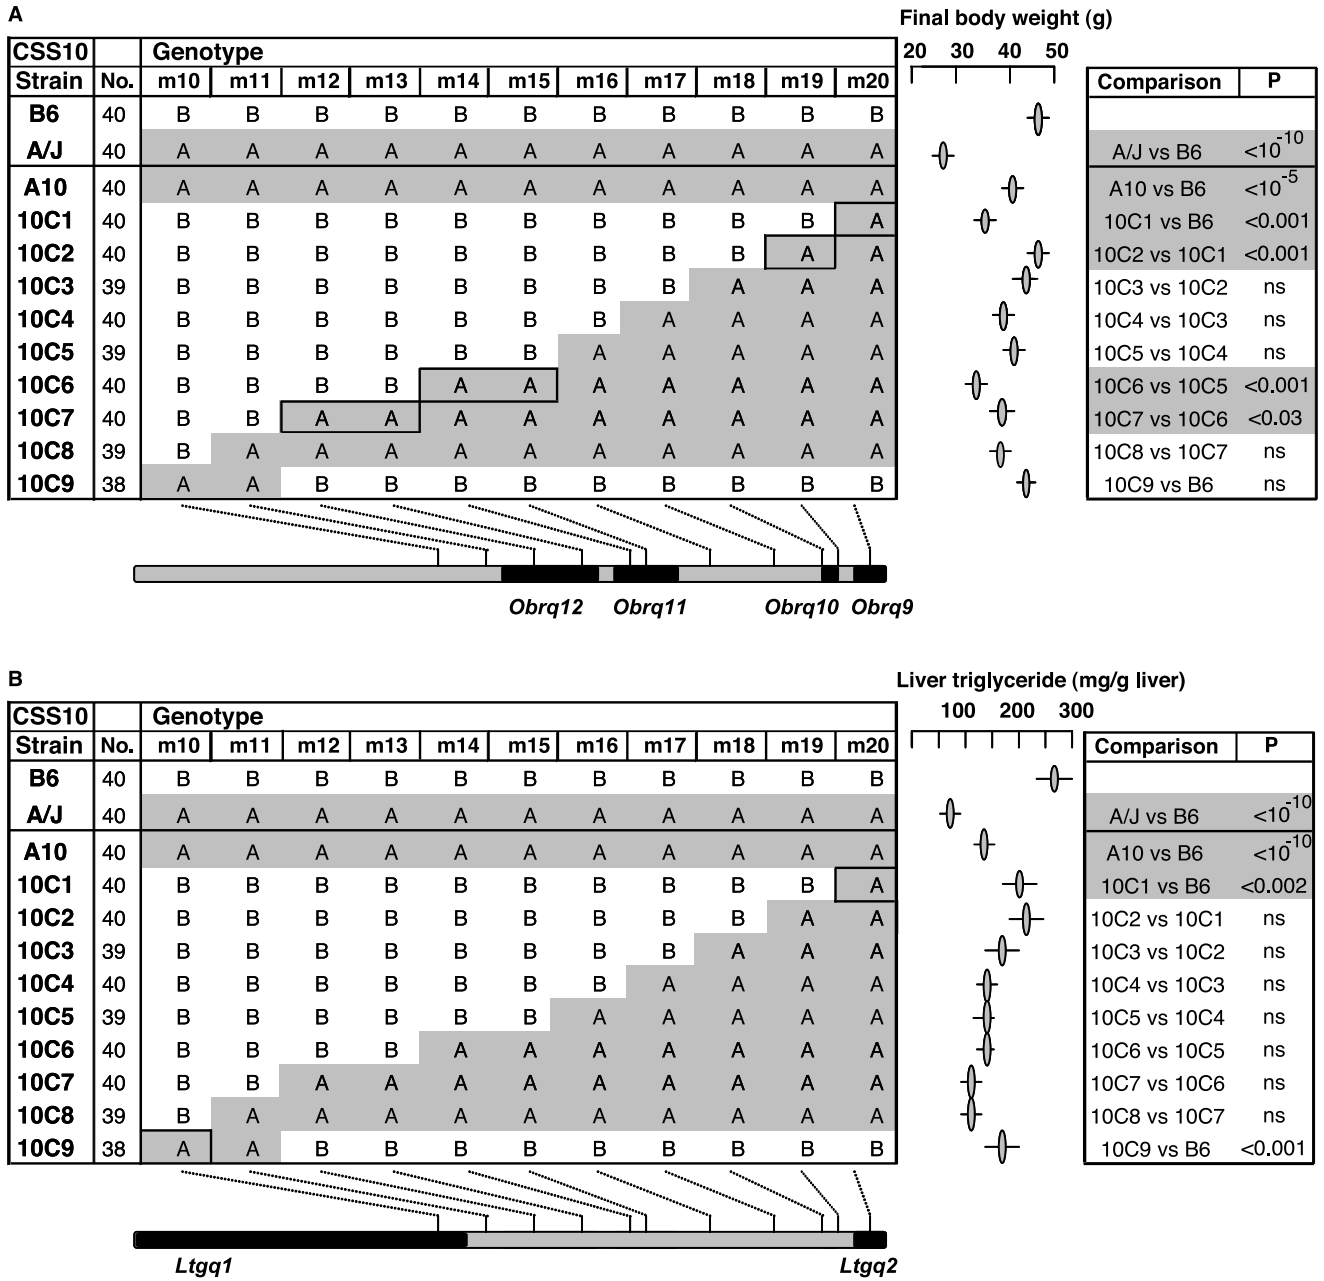

**Fig. S2.** Phenotypic effects and QTLs in congenic strains derived from CSS10. (A) Final body weight (FBW). (B) Liver triglycerides. Genetic markers (m), centromere (*Left*) and telomere (*Right*); ovals, mean trait value; whiskers on the ovals, SEM; and No., sample size. Pairwise comparisons between strains are indicated, by using 2-tailed *t* tests with significance levels (*P*) corrected for multiple hypothesis testing. The locations of *A/J* derived segments are indicated in gray, with the breakpoints of the congenic segments arbitrarily placed midway between the flanking markers, the locations of QTLs in the key congenic strains are indicated in boxes and correspond to the indicated segment (black) of the genetic map (*Bottom*), where the breakpoints for the most likely location for the QTLs are arbitrarily placed midway between the flanking markers. Connectors show the location of m in the congenic strains (*Top*, not to scale) and the genetic map (*Bottom*, at scale).

**Table S1. Average and cumulative phenotypic effects for 90 traits in mouse and rat CSSs**

| Trait name                         | No. CSSs | Method, hi-low           |                      | Method, normalized units |                      |
|------------------------------------|----------|--------------------------|----------------------|--------------------------|----------------------|
|                                    |          | Average effect, unsigned | Cumulative effect, % | Average effect, unsigned | Cumulative effect, % |
| <b>Mouse</b>                       |          |                          |                      |                          |                      |
| Blood                              |          |                          |                      |                          |                      |
| Alanine                            | —        | —                        | —                    | —                        | —                    |
| Arginine                           | 6        | 69.11                    | 414.64               | —                        | —                    |
| Asparagine                         | 4        | 51.81                    | 207.25               | —                        | —                    |
| Campesterol                        | 5        | 44.77                    | 223.85               | 88.81                    | 444.04               |
| Cholesterol                        | 9        | 59.98                    | 539.81               | 96.79                    | 871.07               |
| Citrulline                         | 3        | 78.15                    | 234.45               | —                        | —                    |
| Glutamic Acid                      | 10       | 59.53                    | 595.35               | —                        | —                    |
| Glutamine                          | 14       | 70.81                    | 991.33               | —                        | —                    |
| Glycine                            | 3        | 41.26                    | 123.79               | —                        | —                    |
| Histidine                          | 5        | 65.95                    | 329.76               | 111.37                   | 556.87               |
| Homocysteine                       | —        | —                        | —                    | —                        | —                    |
|                                    | —        | —                        | —                    | —                        | —                    |
|                                    | —        | —                        | —                    | —                        | —                    |
|                                    | 5        | 34.36                    | 171.82               | 81.16                    | 405.82               |
|                                    | 16       | 64.71                    | 1035.38              | —                        | —                    |
|                                    | 3        | 37.29                    | 53.03                | 52.84                    | 75.14                |
| Isoleucine                         | 5        | 65.51                    | 327.57               | 99.73                    | 498.64               |
| Leucine                            | 7        | 71.80                    | 502.57               | 130.16                   | 911.15               |
|                                    | 5        | 42.48                    | 212.39               | 83.25                    | 416.24               |
|                                    | 6        | 36.48                    | 218.88               | —                        | —                    |
| Lysine                             | 4        | 83.00                    | 331.98               | 91.48                    | 365.93               |
| Methionine                         | —        | —                        | —                    | —                        | —                    |
|                                    | 3        | 73.07                    | 219.22               | 112.66                   | 337.98               |
| Ornithine                          | —        | —                        | —                    | —                        | —                    |
|                                    | 11       | 63.15                    | 694.61               | 100.63                   | 1106.93              |
|                                    | 6        | 64.21                    | 385.26               | —                        | —                    |
| Phenylalanine                      | —        | —                        | —                    | —                        | —                    |
| Phosphoserine                      | —        | —                        | —                    | —                        | —                    |
| Proline                            | —        | —                        | —                    | —                        | —                    |
| Serine                             | —        | —                        | —                    | —                        | —                    |
|                                    | 6        | 61.45                    | 368.70               | 112.64                   | 675.85               |
|                                    | 4        | 77.80                    | 311.21               | —                        | —                    |
| Sitosterol                         | 13       | 63.95                    | 831.37               | 77.09                    | 1002.19              |
| Taurine                            | 8        | 52.77                    | 422.18               | 127.11                   | 1016.86              |
| Threonine                          | —        | —                        | —                    | —                        | —                    |
| Tyrosine                           | —        | —                        | —                    | —                        | —                    |
| Valine                             | —        | —                        | —                    | —                        | —                    |
| Bone                               |          |                          |                      |                          |                      |
| Ash content, %                     | —        | —                        | —                    | —                        | —                    |
| Cortical thickness, mm             | 7        | 32.78                    | 80.66                | 148.38                   | 365.12               |
| Cortical area, mm <sup>2</sup>     | 5        | 59.02                    | 295.08               | 121.10                   | 605.51               |
|                                    | 10       | 30.71                    | 221.07               | 108.35                   | 780.08               |
|                                    | 5        | 37.44                    | 122.00               | —                        | —                    |
| Moment of inertia, mm <sup>4</sup> | 11       | 30.46                    | 253.44               | 51.46                    | 428.18               |







**Table S2. Results of test for additivity for the 41 traits that differ significantly between the C57BL/6J and A/J parental strains**

| Trait         | Males    | Females  |
|---------------|----------|----------|
| CtAr          | 0.001635 | 23.42162 |
| Jo            | 0.000199 | 23.36347 |
| Jo/A          | 0.01149  | 38.6366  |
| Tar           | 3.691569 | 1.523602 |
| Mar           | 2.295247 | 5.34E-06 |
| Ash           | 5.914811 | 65.31262 |
| CortThick     | 0.949231 | 0.205332 |
| Stiffness     | 0.616087 | 0.658509 |
| MaxLd         | 14.32031 | 24.87869 |
| PYD           | 72.26927 | 0.72576  |
| Work          | 29.01291 | 0.519314 |
| HCY           | 1.51E-28 | 32.6465  |
| Phosphoserine | 52.32946 | 39.77178 |
| Taurine       | 28.65821 | 3.643139 |
| Threonine     | 75.79999 | 47.74512 |
| Serine        | 1.241689 | 0.919207 |
| Asparagine    | 25.41273 | 23.43951 |
| Glutamic acid | 2.945649 | 4.36E-05 |
| Glutamine     | 11.36827 | 0.40516  |
| Proline       | 54.3612  | 26.13294 |
| Glycine       | 28.32468 | 36.09395 |
| Alanine       | 62.62397 | 8.464281 |
| Citrulline    | 0.771831 | 44.46014 |
| Valine        | 7.353237 | 85.6979  |
| Methionine    | 26.65632 | 11.09739 |
| Isoleucine    | 1.098249 | 0.003235 |
| Leucine       | 0.053641 | 3.329307 |
| Tyrosine      | 48.72865 | 31.38236 |
| Phenylalanine | 82.06938 | 39.54256 |
| Ornithine     | 0.0005   | 0.105953 |
| Lysine        | 4.4715   | 5.408058 |
| Histidine     | 56.95053 | 25.18625 |
| Arginine      | 0.004222 | 7.873186 |
| Cholesterol   | 0.003997 | 38.70646 |
| Campesterol   | 30.84935 | 36.27179 |
| Sitosterol    | 3.45E-05 | 0.802763 |
| I-BW          | 8.08E-05 | NA       |
| F-BW          | 0.00013  | NA       |
| BWG           | 0.051785 | NA       |
| BMI           | 0.002512 | NA       |
| LWt           | 0.208115 | NA       |
| LWperBW       | 15.79331 | NA       |
| B-GLU         | 16.92633 | NA       |
| P-GLU         | 12.17238 | NA       |
| P-INS         | 0.003047 | NA       |
| HOMA          | 0.005745 | NA       |
| P-CHOL        | 12.38178 | NA       |
| P-TRIG        | 5.752733 | NA       |
| L-TRIG        | 5.05E-05 | NA       |
| TL-TRIG       | 0.039035 | NA       |
| TL-TRIGPerBW  | 0.050108 | NA       |
| HFHS.FBW      | 1.04E-06 | NA       |
| LFLS.FBW      | 0.000358 | NA       |

Results are tabulated separately for females and males after Bonferroni correction for multiple hypothesis testing.  $P < 0.05$  indicates a statistically significant departure from the additive model.

## Other Supporting Information Files

[SI Appendix](#)
